# Supplementary material for: What happens after drought ends: synthesizing terms and definitions
Source: PubMed Central journal article supplement (PMC9322664; doi:10.1111/nph.18137), 2022-04-30
Supplement: NPH-235-420-s001.pdf [file NPH-235-420-s001.pdf]

## **New Phytologist Supporting Information**

Article title: **What happens after drought ends: synthesizing terms and definitions**

Authors: Leena Vilonen, Maggie Ross, and Melinda D. Smith

Article acceptance date: 18 March 2022

The following Supporting Information is available for this article:

**Table S1.** Summary of the mechanisms that papers cited as the reason for the response observed.

| <b>Mechanisms</b>                                | <b>Number of papers</b> |
|--------------------------------------------------|-------------------------|
| <b>Biotic</b>                                    |                         |
| Changes in physiology                            | 13                      |
| Foliage losses                                   | 5                       |
| Loss of trees/ evapotranspiration                | 1                       |
| Species trait shifts                             | 1                       |
| Photoprotection                                  | 1                       |
| Reductions in photosynthesis                     | 1                       |
| Root to shoot ratios                             | 1                       |
| Plant community change                           | 2                       |
| Seedling establishment                           | 1                       |
| Microbial community mediated                     | 4                       |
| Higher levels of microbial biomass               | 1                       |
| Less active microbial community                  | 1                       |
| Microbial turnover of plant-derived C            | 1                       |
| Age/height of plant                              | 4                       |
| Effect of neighboring trees                      | 2                       |
| Root exudation                                   | 2                       |
| Root regeneration/growth                         | 1                       |
| Stomatal and biochemical traits                  | 1                       |
| Plant enzyme activity change                     | 4                       |
| Prioritization of leaf flushing                  | 1                       |
| Biomass allocations and carbohydrate metabolisms | 1                       |
| Carbon reserves                                  | 5                       |
| Storage of carbohydrates                         | 1                       |
| Loss of carbohydrates                            | 2                       |
| <b>Abiotic</b>                                   |                         |
| Water reserves left over from year before        | 5                       |
| Change in nutrient concentrations                | 5                       |
| Elevated nitrogen levels                         | 3                       |
| Increased light availability                     | 2                       |
| Precipitation related (water amount)             | 5                       |
| Unclear                                          | 5                       |

---
